# Supplementary material for: Anti-TNF Drugs for Chronic Uveitis in Adults—A Systematic Review and Meta-Analysis of Randomized Controlled Trials
Source: PubMed Central journal article supplement (PMC6543521; doi:10.3389/fmed.2019.00104), 2019-05-24
Supplement: Table_1.pdf [file Table_1.pdf]

Supplementary Table 1: Population baseline characteristics by individual study

|                                              |                                       | Foster                                                                    |           | VISUAL I    |             | VISUAL II   |             |
|----------------------------------------------|---------------------------------------|---------------------------------------------------------------------------|-----------|-------------|-------------|-------------|-------------|
|                                              |                                       | Placebo                                                                   | Anti-TNF  | Placebo     | Anti-TNF    | Placebo     | Anti-TNF    |
| No. of patients                              |                                       | 10                                                                        | 10        | 107         | 110         | 111         | 115         |
| Age in years mean (SD)                       |                                       | 45 (N.S.)                                                                 | 48 (N.S.) | 42.6 (14.2) | 42.7 (15.6) | 42.2 (14.0) | 42.9 (12.9) |
| Male gender (n/)%                            |                                       | 1/10%                                                                     | 73/30%    | a 93/43%*   |             | 39/35%      | 49/43%      |
| Race (n/%)                                   | White                                 | N.S.                                                                      |           | 86/80%      | 88/80%      | 93/84%      | 96/83%      |
|                                              | Black                                 |                                                                           |           | 12/11%      | 11/10%      | 8/7%        | 6/5%        |
|                                              | Asian                                 |                                                                           |           | 2/2%        | 4/4%        | 3/3%        | 3/3%        |
|                                              | Other                                 |                                                                           |           | 7/7%        | 7/6%        | 5/5%        | 9/8%        |
| Type of uveitis (n/%)                        | Panuveitis                            | N.S.                                                                      |           | 47/44%      | 50/45%      | 46/41%      | 57/50%      |
|                                              | Intermediate and posterior            |                                                                           |           | 0           |             | 1/1%        | 2/2%        |
|                                              | Intermediate                          |                                                                           |           | 23/21%      | 24/22%      | 30/27%      | 17/15%      |
|                                              | Posterior                             |                                                                           |           | 37/35%      | 36/33%      | 34/31%      | 39/34%      |
| Diagnosis                                    | Idiopathic uveitis                    | 7/70%                                                                     | 5/50%     | 45/42%      | 36/33%      | 40/36%      | 29/25%      |
|                                              | Birdshot choroidopathy                | 0                                                                         | 0         | 20/19%      | 24/22%      | 15/14%      | 15/13%      |
|                                              | Multifocal choroiditis and panuveitis | 0                                                                         | 0         | 3/3%        | 8/7%        | 2/2%        | 5/4%        |
|                                              | Vogt-Koyanagi-Harada                  | 0                                                                         | 0         | 14/13%      | 11/10%      | 25/23%      | 26/23%      |
|                                              | Behçet's                              | 0                                                                         | 0         | 4/4%        | 12/11%      | 6/5%        | 18/16%      |
|                                              | Sarcoid                               | 0                                                                         | 0         | 8/7%        | 10/9%       | 14/13%      | 10/9%       |
|                                              | HLA-B27-associated                    | 1/10%                                                                     | 2/20%     | 0           | 0           | 0           | 0           |
|                                              | SLE-associated                        | 1/10%                                                                     | 2/20%     | 0           | 0           | 0           | 0           |
|                                              | Arthritis-associated                  | 1/10%                                                                     | 1/10%     | 0           | 0           | 0           | 0           |
|                                              | Other                                 | 0                                                                         | 0         | 13/12%      | 9/8%        | 9/8%        | 12/10%      |
| Duration of uveitis in months Mean (SD)      |                                       | N.S.                                                                      |           | 51.0 (72.2) | 40.2 (51.2) | 51.0 (72.2) | 40.2 (51.2) |
| Concomitant immunomodulatory treatment (n/%) | Azathioprine                          | All patients were under MTX at the beginning of the study, then suspended |           | 4/4%        | 4/4%        | 11/10%      | 3/3%        |
|                                              | Cyclosporine                          |                                                                           |           | 3/3%        | 10/9%       | 11/10%      | 15/13%      |
|                                              | Methotrexate                          |                                                                           |           | 12/11%      | 9/8%        | 14/13%      | 19/17%      |

|              |                       |      |        |        |         |         |
|--------------|-----------------------|------|--------|--------|---------|---------|
|              | Mycophenolate mofetil |      | 14/14% | 11/10% | 17/15%  | 17/15%  |
| Affected eye | Left only             | N.S. | 5/5%   | 5/5%   | 3/3%    | 2/2%    |
|              | Right only            |      | 3/3%   | 7/6%   | 4/4%    | 1/1%    |
|              | Both                  |      | 99/93% | 98/89% | 104/94% | 112/97% |

**Legend:** No: number; HLA: human leucocyte antigen; TNF: tumor necrosis factor; N.S.: non-stated; MTX: methotrexate  
 \* Only aggregated data for gender provided.
