# Supplementary material for: Anti-TNF Drugs for Chronic Uveitis in Adults—A Systematic Review and Meta-Analysis of Randomized Controlled Trials
Source: PubMed Central journal article supplement (PMC6543521; doi:10.3389/fmed.2019.00104), 2019-05-24
Supplement: Table_2.pdf [file Table_2.pdf]

Supplementary Table 2: Summary of findings

| <b>Etanercept compared to placebo for inactive non-infectious uveitis</b> |                        |        |                                       |                                       |                                |  |
|---------------------------------------------------------------------------|------------------------|--------|---------------------------------------|---------------------------------------|--------------------------------|--|
|                                                                           |                        |        | Anticipated absolute effects (95% CI) |                                       |                                |  |
|                                                                           |                        |        | Without Etanercept                    | With Etanercept                       | Difference                     |  |
| Risk of not worsening BCVA<br>№ of participants: 20<br>(1 RCT)            | RR (0.69 to 1.18) 0.90 | 100.0% | 90.0%<br>(69.0 to 100.0)              | 10.0% fewer<br>(31 fewer to 18 more)  | ⊕<br>VERY LOW <sup>a,b</sup>   |  |
| <b>Adalimumab compared to placebo for active non-infectious uveitis</b>   |                        |        |                                       |                                       |                                |  |
|                                                                           |                        |        | Anticipated absolute effects (95% CI) |                                       |                                |  |
|                                                                           |                        |        | Without Adalimumab                    | With Adalimumab                       | Difference                     |  |
| Risk of not worsening BCVA<br>№ of participants: 217<br>(1 RCT)           | RR (1.32 to 2.32) 1.75 | 37.4%  | 65.4%<br>(49.3 to 86.7)               | 28.0% more<br>(12 more to 49.3 more)  | ⊕⊕⊕⊕<br>HIGH                   |  |
| <b>Adalimumab compared to placebo for inactive non-infectious uveitis</b> |                        |        |                                       |                                       |                                |  |
|                                                                           |                        |        | Anticipated absolute effects (95% CI) |                                       |                                |  |
|                                                                           |                        |        | Without Adalimumab                    | With Adalimumab                       | Difference                     |  |
| Risk of not worsening BCVA<br>№ of participants: 226<br>(1 RCT)           | RR (1.12 to 1.53) 1.31 | 65.8%  | 86.2%<br>(73.7 to 100.0)              | 20.4% more<br>(7.9 more to 34.9 more) | ⊕⊕⊕⊕<br>HIGH                   |  |
| <b>Anti-TNF compared to placebo for non-infectious uveitis</b>            |                        |        |                                       |                                       |                                |  |
|                                                                           |                        |        | Anticipated absolute effects (95% CI) |                                       |                                |  |
|                                                                           |                        |        | Without Anti-TNF                      | With Anti-TNF                         | Difference                     |  |
| Risk of withdrawals<br>№ of participants: 472<br>(3 RCTs)                 | RR (0.62 to 4.26) 1.63 | 9.7%   | 15.9%<br>(6.0 to 41.5)                | 6.1% more<br>(3.7 fewer to 31.8 more) | ⊕⊕⊕<br>MODERATE <sup>b,c</sup> |  |

**GRADE Working Group grades of evidence:** **High quality:** We are very confident that the true effect lies close to that of the estimate of the effect; **Moderate quality:** We are moderately confident in the effect estimate: The true effect is likely to be close to the estimate of the effect, but there is a possibility that it is substantially different; **Low quality:** Our confidence in the effect estimate is limited: The true effect may be substantially different from the estimate of the effect; **Very low quality:** We have very little confidence in the effect estimate: The true effect is likely to be substantially different from the estimate of effect. \***The risk in the intervention group** (and its 95% confidence interval) is based on the

assumed risk in the comparison group and the **relative effect** of the intervention (and its 95% CI). a. Very serious risk of bias due to multiple domains at high or unclear risk; b. Optimal information size not met; c. Although one trial was at high risk of bias, it represented less than 10% of information in the analysis. As so we opted not to downgrade. **CI**: Confidence interval; **RR**: Risk ratio
